# 1 Effectiveness of Pasteurization for the Inactivation of H5N1

## 2 Influenza Virus in Raw Whole Milk

3 Tamiru Alkie <sup>1</sup>, Neda Nasheri <sup>2,3</sup>, Pablo Romero-Barrios <sup>2</sup>, Angela Catford <sup>2</sup>, Jay  
4 Krishnan <sup>4</sup>, Lemarie Pama <sup>1</sup>, Kathleen Hooper-McGrevy <sup>1</sup>, Charles Nfon <sup>1,7</sup>, Todd Cutts  
5 <sup>4</sup>, Yohannes Berhane <sup>1, 5, 6, 7</sup>

6 1- National Centre for Foreign Animal Disease, Canadian Food Inspection Agency,  
7 Winnipeg, Manitoba

8 2- Bureau of Microbial Hazards, Health Canada, Ottawa, Ontario

9 3- Department of Biochemistry Microbiology, and Immunology, University of Ottawa,  
10 Ottawa, Ontario

11 4- National Microbiology Laboratory, Public Health Agency of Canada Public Health Agency  
12 of Canada, Winnipeg, Manitoba

13 5- Department of Veterinary Pathology, Western College of Veterinary Medicine, University  
14 of Saskatchewan, Saskatoon, SK

15 6- Department of Pathobiology, Ontario Vet College, University of Guelph, Guelph, ON

16 7- Department of Animal Science, University of Manitoba, Winnipeg, MB

17

### 18 Corresponding authors:

19 Yohannes Berhane: [yohannes.berhane@inspection.gc.ca](mailto:yohannes.berhane@inspection.gc.ca)

20 Neda Nasheri: [neda.nasheri@hc-sc.gc.ca](mailto:neda.nasheri@hc-sc.gc.ca)

21

22 **Abstract**

23 Highly pathogenic avian influenza (HPAI) clade 2.3.4.4b H5Nx viruses continue to  
24 cause episodic incursions and have been detected in more than 12 taxonomic orders  
25 encompassing more than 80 avian species, land and marine mammals, including recent  
26 detections in dairy cattle. The HPAI H5N1 spillover to these important livestock species  
27 creates a new interface for human exposure and raises food safety concerns. Presence  
28 of H5N1 genetic material in one out of five retail pasteurized milk samples in the USA  
29 has prompted the evaluation of pasteurization processes for the inactivation of influenza  
30 viruses. Our study examined whether pasteurization could effectively inactivate HPAI  
31 H5N1 inoculated raw whole milk samples. We heated 1 mL of non-homogenized cow's  
32 milk samples to attain an internal temperature of 63°C or 72°C and spiked with 6.3 log  
33 EID<sub>50</sub> of clade 2.3.4.4b H5N1 virus. Complete inactivation was achieved after incubation  
34 of the H5N1 spiked raw milk at 63°C for 30 minutes. In addition, complete viral  
35 inactivation was observed in seven out of eight replicates of raw milk samples treated at  
36 72°C for 15 seconds. In one replicate, a 4.56 log reduction was achieved, which is  
37 about 1 log higher than the average viral quantities detected in bulk tanks in affected  
38 areas. Therefore, we conclude that pasteurization of milk is an effective strategy for  
39 mitigation of risk of human exposure to milk contaminated with H5N1 virus.

40 **Key words:** H5N1, highly pathogenic avian influenza (HPAI), pasteurization, milk

41

## 42        **1. Introduction**

43        The spread of HPAI H5Nx viruses bearing clade 2.3.4.4b hemagglutinin (HA) and their  
44        variants generated by reassortment with low pathogenicity avian influenza viruses  
45        (LPAIVs) remain the major causes of large-scale HPAI outbreaks in domestic poultry  
46        and wild birds worldwide (Youk, et al. 2023, Alkie, et al. 2022) . They have also caused  
47        multiple spillover infections into mammals resulting in mass die-offs in the Americas  
48        (Rimondi, et al. 2024, Alkie, et al. 2023). However, naturally occurring HPAI infections in  
49        ruminant livestock have never been reported before 2024. The fast spread of HPAI virus  
50        in dairy cows, as well as sustained transmission among dairy herds in 13 states in the  
51        USA since March 2024 indicates wider host ranges of HPAI clade 2.3.4.4b H5N1  
52        viruses (FDA. ). The detection of infectious virus in milk samples obtained from infected  
53        dairy cows indicate the potential risk of accidental introduction of H5N1 virus into the  
54        human food supply. Although human foodborne infection with H5N1 virus has not been  
55        confirmed to date, exposure to contaminated milk in mice and cats resulted in severe  
56        and fatal infections (Guan, et al. 2024, Burrough, et al. 2024).

57        Dairy milk is usually sold pasteurized, and the sale of raw milk is not permitted in some  
58        jurisdictions like Canada (Health Canada. ). Based on the understanding of viral  
59        structure and previous studies on pasteurization of eggs and human milk (Chmielewski,  
60        et al. 2011, Swayne and Beck. 2004, Pitino, et al. 2021), it is assumed that  
61        pasteurization of milk would be effective against H5N1 viruses, but recent studies have  
62        demonstrated a range of results (Cui, et al. 2024, Schafers, et al. 2024, Kaiser, et al.  
63        2024, Guan, et al. 2024). Also, studies performed using other viruses have  
64        demonstrated that certain milk components such as fat globules and casein micelles

65 may protect viruses against heat treatment (Tomasula, et al. 2007). Although traces of  
66 H5N1 genomic materials have been detected in about 20% of retail dairy samples that  
67 were sampled in USA supermarkets, infectious H5N1 viruses have never been isolated  
68 from retailed pasteurized dairy products to date (FDA. ). With the ongoing rapid virus  
69 evolution and spread of H5N1, more dairy farms could be infected in the USA and  
70 potentially in other countries. Should raw milk from infected asymptomatic cows  
71 accidentally enter the processing chain for human consumption, pasteurization can be  
72 an effective treatment to inactivate the H5N1 virus. In the current study, we simulated  
73 pasteurization processes typically used by the dairy industry on unpasteurized and  
74 unhomogenized raw milk inoculated with H5N1 clade 2.3.4.4b at titers that have been  
75 reported in the affected farms (Spackman, et al. 2024 ).

## 76 **2. Materials and Methods**

### 77 *2.1. Heat inactivation at 63°C for 30 minutes*

78 The temperature combination of 63°C for 30 minutes represents a vat or bulk  
79 pasteurization treatment sometimes used in commercial dairy processing plants. Firstly,  
80 fresh bulk raw milk obtained from a dairy farm in Manitoba, Canada was treated for 1 hr  
81 at room temperature with a cocktail containing antibiotics and antifungals (streptomycin,  
82 penicillin, vancomycin, nystatin and amphotericin) (Sigma-Aldrich) to prevent any  
83 harmful effects of bacteria on the embryonated chicken eggs used to test the  
84 infectiousness of HPAI H5N1 virus. The sterility of the milk samples from bacteria was  
85 confirmed by inoculating into Columbia Blood Agar Base medium and monitored daily  
86 for bacterial growth. The entire procedure was conducted in a biosafety level 3+ (BSL-  
87 3+) facility at the National Centre for Foreign Animal Disease (NCFAD) in Winnipeg,

88 Manitoba. Nine-hundred and ninety microliters milk (990  $\mu$ L) each was placed in four 1.5  
89 mL Eppendorf tubes and was heated in a water bath to attain an internal temperature of  
90 63°C. The temperature was monitored using the Applied Biosystems Thermal Cycler  
91 Temperature Verification System (Model 4500). The raw milk in all four tubes was  
92 spiked with 10  $\mu$ L of clade 2.3.4.4b H5N1 virus, recapped and treated for 30 minutes.  
93 The virus was designated as A/Turkey Vulture/Ontario/FAV473-3/2022 having a stock  
94 titer of  $1 \times 10^{8.3}$  EID<sub>50</sub>/mL isolated from Canada and archived at NCFAD. The final virus  
95 concentration before heat inactivation was calculated at 6.3 log<sub>10</sub>EID<sub>50</sub>. Tubes were then  
96 placed on ice to cool down their contents. The contents of three of the four tubes were  
97 inoculated through the allantoic route into 9-days-old embryonated specific-pathogen-  
98 free (SPF) chicken eggs (ECEs) following the standard protocol described in the Manual  
99 of Diagnostic Tests and Vaccines for Terrestrial Animals (World Organisation for Animal  
100 Health. 2023)(n = 5 eggs/tube and 200  $\mu$ L per egg) and incubated at 37°C . The fourth  
101 tube (replicate 4) was serially diluted (10-fold) and inoculated into ECEs (n = 5  
102 eggs/dilution) to determine the log reduction of the virus following treatment at 63°C for  
103 30 minutes. Allantoic fluid was collected from each dead or live embryo during the first  
104 and second passages in ECEs and checked by hemagglutination assay using the  
105 standard protocol described above (World Organisation for Animal Health. 2023) to  
106 confirm the presence of infectious avian influenza viruses. The temperature of three  
107 non-spiked milk samples heated at 63°C and kept on ice were recorded every minute  
108 until reaching 4°C.

109 *2.2. Heat inactivation at 72°C for 15 seconds*

110 The temperature combination of 72°C for 15 seconds represents a high temperature  
111 short time (HTST) pasteurization treatment commonly used in commercial dairy  
112 processing plants. This heat inactivation experiment was conducted in two independent  
113 trials conducted on different days. The raw milk was treated with the antibiotic cocktails  
114 as described above. The heating of raw milk to attain an internal temperature 72°C was  
115 conducted in a heating block (Eppendorf Thermomixer model R) and the temperature  
116 was monitored using an electronic temperature probe inserted into two tubes containing  
117 raw milk samples (temperature control) when the first and last experimental samples  
118 were spiked and heat-treated. The heating block temperature was increased to 76°C to  
119 attain internal milk temperature of 72°C based on the Applied Biosystems Thermal  
120 Cycler Temperature Verification System reading. Ten microliters (10 µL) of virus were  
121 spiked into the raw milk when the internal temperature of the milk reached 72°C and  
122 after 15 seconds of incubation, the lid of the Eppendorf tube was recapped and placed  
123 on ice to cool. This procedure was performed to remove possible impact of the  
124 temperature ramp up, which would not be experienced in a commercial pasteurization  
125 process where nearly instantaneous changes in temperature are experienced by fluid  
126 milk passing through small diameter tubing or pipe. The procedure of spiking of the  
127 virus into the raw milk, amount and concentration of virus and ECE inoculation  
128 procedures were the same for the 63°C for 30 minutes treatment protocol. All four  
129 tubes in each trial were then tested in embryonated ECE as described above.

130 The gradual temperature decline on ice was recorded in three non-spiked milk samples  
131 treated as mentioned above.

### 132 **3. Results**

133 The allantoic fluids from dead and live chicken embryos were collected separately  
134 (without pooling) at the end of the 1<sup>st</sup> and 2<sup>nd</sup> passages and were individually checked  
135 for HA activity. Complete H5N1 virus inactivation was achieved in all milk samples (four  
136 replicates) treated at 63°C for 30 minutes. No HA activity was detected in any of the  
137 allantoic fluid harvested from live embryonated eggs during the first and second  
138 passages. Moreover, allantoic fluid collected from embryonated eggs that died of non-  
139 specific causes (likely from injections of 200 µL milk) was negative for any HA activity. In  
140 addition, complete viral inactivation was achieved in 7 out of 8 replicates treated at 72°C  
141 for 15 seconds and no infectious virus was recovered in ECE in either passage. A 4.56  
142 log reduction in virus titers was achieved in the eighth replicate. We observed that milk  
143 treated at 72°C for 15 seconds underwent progressive temperature decline (Figure 1)  
144 when kept on ice, mimicking the pasteurization and chilling processes in the processing  
145 plants. Within one minute on ice, milk treated at 72°C dropped to 56°C and after 5  
146 minutes, the temperature reached 25°C (Figure 1). A similar temperature decline trend  
147 was observed for the milk treated at 63°C. Therefore, we can conclude that  
148 pasteurization of milk at the two standard heat treatments used by industry can  
149 effectively inactivate clade 2.3.4.4b H5N1 viruses in raw milk that may have incoming  
150 viral titres of approximately 4.5 and 6 log<sub>10</sub> EID<sub>50</sub>.

#### 151 **4. Discussion**

152 The spillover and transmission of HPAI A(H5N1) clade 2.3.4.4b virus to dairy cows in  
153 the USA and the regular detection of infectious virus in raw milk obtained from infected  
154 cows point to the potential risk of human exposure to the virus as a result of the  
155 handling or ingestion of raw milk and dairy products. Since spring of 2024, various

156 regulatory agencies in the US and Canada have tested retail pasteurized milk  
157 samples for the presence of HPAI H5N1 viruses and evaluated the associated health  
158 risks. Studies in the USA have shown the presence of H5N1 virus genetic fragments  
159 often in significant concentrations in pasteurized retail milk samples, however, follow up  
160 tests failed to detect any infectious H5N1 virus (FDA. ). This prompted public health  
161 officials to declare that consumption of pasteurized retail milk was safe (FDA. ).

162 While the knowledge of general viral behaviour for influenza A viruses, and previous  
163 data (Chmielewski, et al. 2011, Swayne and Beck. 2004, Pitino, et al. 2021) allows for a  
164 sound extrapolation that pasteurization would likely be effective to inactivate HPAI clade  
165 2.3.4.4b H5N1 virus in milk from dairy cows, the detection of this virus in this species  
166 and matrix is a new phenomenon. As we did not have access to any milk or milk  
167 products from dairy cows naturally infected with HPAI virus, we conducted an  
168 independent study by inoculating H5N1 virus into milk samples to evaluate the  
169 efficiency of standard pasteurization treatments in Canada in inactivation of H5N1 virus.  
170 Although we used a benchtop method for heat inactivation, the pasteurization, and  
171 cooling steps performed simulate the commercial pasteurization process, which was  
172 tested in the recent H5N1 inactivation study using a modified continuous flow  
173 pasteurizer method (Spackman, et al. )

174 We observed that heat treatment at 63°C for 30 minutes effectively inactivates H5N1  
175 virus present in the milk, as supported by all recent published literature (Cui, et al. 2024,  
176 Schafers, et al. 2024, Kaiser, et al. 2024, Guan, et al. 2024). The combination of  
177 inoculation of ECEs and confirmation of live viruses using the HA assay is considered  
178 the most sensitive method of detection for this virus, compared to cell culture assays.



179 Thus, we can conclude that the standard vat pasteurization at 63°C for 30 minutes  
180 guarantees virus inactivation and food safety.

181 Heat treatment of milk samples inoculated with H5N1 viruses at 72°C for 15 seconds  
182 resulted in complete virus inactivation in 7 out of 8 replicates and a significant reduction  
183 of infectious virus in the remaining replicate. This finding is consistent with recent  
184 reports where residual levels of infective viruses were detected in naturally  
185 contaminated milk upon treatment at 72°C for 15 seconds (Guan, et al. 2024, Kaiser, et  
186 al. 2024). Two other recent studies assessing the effectiveness of milk pasteurization to  
187 inactivate influenza virus found that treatment at 72°C for 15 seconds was effective in  
188 fully eliminating infectivity below the limit of detection (Schafers, et al. 2024, Cui, et al.  
189 2024). In one of the two studies, the total volume of inoculated milk for each treatment  
190 was only 10 µL, which is a small volume compared to the present study (Cui, et al.  
191 2024). Together, these existing published reports of heat inactivation of influenza  
192 viruses in milk employed PCR thermocyclers and relatively smaller milk volume.

193 A final point of comparison relates to the speed of temperature changes for treated  
194 samples in order to best mimic real-life scenarios. In the PCR thermocyclers heating  
195 and cooling setup, milk treated at 72°C can instantly cool within seconds (Cui, et al.  
196 2024). In our heat treatment and chilling protocols, we sought to mimic the refrigeration  
197 processes of pasteurized milk in dairy processing plants, creating a gradual decline in  
198 milk temperature during refrigeration which may still inactivate residual H5N1 viruses. In  
199 the modified continuous flow pasteurizer study to examine the effectiveness of HTST  
200 inactivation method, the H5N1 inoculated milk was preheated at 40°C. An additional  
201 heating for 9 seconds at 72°C before a HTST pasteurization could have an additive

202 effect on virus inactivation (Spackman, et al. 2024). Herein we observed complete  
203 inactivation of H5N1 virus in 7 out of 8 replicates at 72°C for 15 seconds, and 4.56 log  
204 reduction in one of the replicates, which is one log greater than the mean quantity of  
205 infectious virus detected in raw milk from bulk storage tank of naturally contaminated  
206 samples (Spackman, et al. 2024).

207 The experimental studies conducted by inoculating known concentrations of viruses into  
208 milk do not fully reflect the actual commercial milk pasteurization and refrigeration  
209 processes, yet experiments which simulate pasteurization and gradual chilling steps do  
210 provide valuable evidence that H5N1 viruses can be effectively inactivated. Although  
211 there is no evidence of foodborne transmission of HPAI H5N1 virus to humans, our data  
212 suggest that the pasteurization of milk could effectively mitigate the risk of human  
213 exposure to live virus, and subsequent infections should the foodborne route be proven.  
214 Also, a longer treatment at low temperature scheme is a more effective method of H5N1  
215 inactivation in dairy products during unprecedented large scale HPAI outbreaks in dairy  
216 cows.

## 217 **Acknowledgements**

218 This study is financially supported by the Defence Research and Development Canada  
219 (DRDC) CW2248375 -39903-23076 CSSP 2541 and CFIA HPAI Emergency Grant as  
220 well as Health Canada. The authors would like to thank Dr. Sean Li and Dr. Sandeep  
221 Tamber for reviewing the manuscript and providing insightful comments.

## 222 **Conflict of Interest**

223 The authors declare no conflict of interest.

224 **Figure legend**

225 **Figure 1.** Temperature plot of cooling whole milk after heat treatment and incubation on  
226 crushed ice. The dots represent the average temperature of three replicates and error  
227 bars represent standard error. The pasteurization at 63°C for 30 minutes is shown in  
228 black color and the treatment at 72°C for 15 seconds is shown in red.

229

## References

- 230 Alkie, T. N., Lopes, S., Hisanaga, T., Xu, W., Suderman, M., Koziuk, J., Fisher, M.,  
231 Redford, T., Lung, O., Joseph, T., Himsworth, C. G., Brown, I. H., Bowes, V., Lewis, N.  
232 S. and Berhane, Y. 2022. A threat from both sides: Multiple introductions of genetically  
233 distinct H5 HPAI viruses into Canada via both East Asia-Australasia/Pacific and Atlantic  
234 flyways. *Virus Evol.* 8, veac077.
- 235 Alkie, T. N., Cox, S., Embury-Hyatt, C., Stevens, B., Pople, N., Pybus, M. J., Xu, W.,  
236 Hisanaga, T., Suderman, M., Koziuk, J., Kruczkiewicz, P., Nguyen, H. H., Fisher, M.,  
237 Lung, O., Erdelyan, C. N. G., Hochman, O., Ojkic, D., Yason, C., Bravo-Araya, M.,  
238 Bourque, L., Bollinger, T. K., Soos, C., Giacinti, J., Provencher, J., Ogilvie, S., Clark, A.,  
239 MacPhee, R., Parsons, G. J., Eaglesome, H., Gilbert, S., Saboraki, K., Davis, R., Jerao,  
240 A., Ginn, M., Jones, M. E. B. and Berhane, Y. 2023. Characterization of neurotropic  
241 HPAI H5N1 viruses with novel genome constellations and mammalian adaptive  
242 mutations in free-living mesocarnivores in Canada. *Emerg. Microbes Infect.* 12,  
243 2186608.
- 244 Burrough, E. R., Magstadt, D. R., Petersen, B., Timmermans, S. J., Gauger, P. C.,  
245 Zhang, J., Siepker, C., Mainenti, M., Li, G., Thompson, A. C., Gorden, P. J., Plummer,  
246 P. J. and Main, R. 2024. Highly Pathogenic Avian Influenza A(H5N1) Clade 2.3.4.4b  
247 Virus Infection in Domestic Dairy Cattle and Cats, United States, 2024. *Emerg. Infect.*  
248 *Dis.* 30, 10.3201/eid3007.240508.

- 249 Chmielewski, R. A., Beck, J. R. and Swayne, D. E. 2011. Thermal inactivation of avian  
250 influenza virus and Newcastle disease virus in a fat-free egg product. *J. Food Prot.* 74,  
251 1161-1168.
- 252 Cui, P., Zhuang, Y., Zhang, Y., Chen, L., Chen, P., Li, J., Feng, L., Chen, Q., Meng, F.,  
253 Yang, H., Jiang, Y., Deng, G., Shi, J., Chen, H. and Kong, H. 2024. Does pasteurization  
254 inactivate bird flu virus in milk? *Emerg. Microbes Infect.*, 2364732.
- 255 FDA. Updates on Highly Pathogenic Avian Influenza (HPAI). 2024.
- 256 Guan, L., Einfeld, A. J., Pattinson, D., Gu, C., Biswas, A., Maemura, T., Trifkovic, S.,  
257 Babujee, L., Presler, R. J., Dahn, R., Halfmann, P. J., Barnhardt, T., Neumann, G.,  
258 Thompson, A., Swinford, A. K., Dimitrov, K. M., Poulsen, K. and Kawaoka, Y. 2024.  
259 Cow's Milk Containing Avian Influenza A(H5N1) Virus - Heat Inactivation and Infectivity  
260 in Mice. *N. Engl. J. Med.*
- 261 Health Canada. Raw or unpasteurized milk. 2024.
- 262 Kaiser, F., Morris, D. H., Wickenhagen, A., Mukesh, R., Gallogly, S., Yinda, K. C., de  
263 Wit, E., Lloyd-Smith, J. O. and Munster, V. J. 2024. Inactivation of Avian Influenza  
264 A(H5N1) Virus in Raw Milk at 63 degrees C and 72 degrees C. *N. Engl. J. Med.*
- 265 Pitino, M. A., O'Connor, D. L., McGeer, A. J. and Unger, S. 2021. The impact of thermal  
266 pasteurization on viral load and detectable live viruses in human milk and other  
267 matrices: a rapid review. *Appl. Physiol. Nutr. Metab.* 46, 10-26.

- 268 Rimondi, A., Vanstreels, R. E. T., Olivera, V., Donini, A., Lauriente, M. M. and Uhart, M.  
269 M. 2024. Highly Pathogenic Avian Influenza A(H5N1) Viruses from Multispecies  
270 Outbreak, Argentina, August 2023. *Emerg. Infect. Dis.* 30, 812-814.
- 271 Schafers, J., Warren, C. J., Yang, J., Zhang, J., Cole, S. J., Cooper, J., Drewek, K.,  
272 Kolli, B. R., McGinn, N., Qureshi, M., Reid, S. M., Peacock, T. P., Brown, I., James, J.,  
273 Banyard, A. C., Iqbal, M., Digard, P. and Hutchinson, E. 2024. Pasteurisation  
274 temperatures effectively inactivate influenza A viruses in milk. medRxiv,  
275 2024.05.30.24308212.
- 276 Spackman, E., Anderson, N., Wlaker, S., Suarez, D., Jones, D., McCoig, A., Colonius,  
277 T., Roddy, T. and Chaplinski, N. *Inactivation of HPAIV by continuous flow*  
278 *pasteurization*. preprint.
- 279 Swayne, D. E. and Beck, J. R. 2004. Heat inactivation of avian influenza and Newcastle  
280 disease viruses in egg products. *Avian Pathol.* 33, 512-518.
- 281 Tomasula, P. M., Kozempel, M. F., Konstance, R. P., Gregg, D., Boettcher, S., Baxt, B.  
282 and Rodriguez, L. L. 2007. Thermal inactivation of foot-and-mouth disease virus in milk  
283 using high-temperature, short-time pasteurization. *J. Dairy Sci.* 90, 3202-3211.
- 284 World Organisation for Animal Health, (. 2023. *Manual of Diagnostic Tests and*  
285 *Vaccines*  
286 *for Terrestrial Animals*, twelfth edition 2023. 2024.

287 Youk, S., Torchetti, M. K., Lantz, K., Lenocho, J. B., Killian, M. L., Leyson, C., Bevins, S.  
288 N., Dilione, K., Ip, H. S., Stallknecht, D. E., Poulson, R. L., Suarez, D. L., Swayne, D. E.  
289 and Pantin-Jackwood, M. J. 2023. H5N1 highly pathogenic avian influenza clade  
290 2.3.4.4b in wild and domestic birds: Introductions into the United States and  
291 reassortments, December 2021-April 2022. *Virology* 587, 109860.

292

293

294 Figure 1.

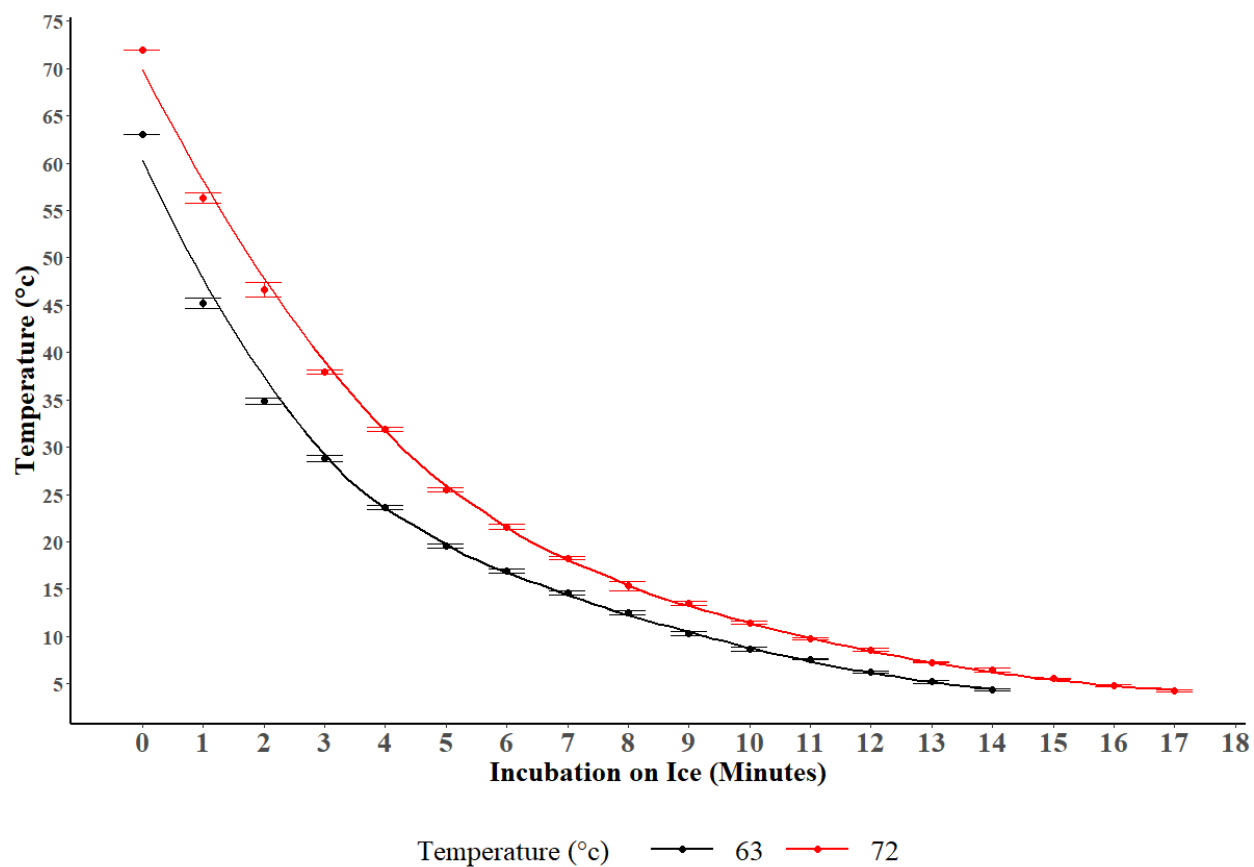

295  
296  
297
